# Supplementary material
Source: PubMed Central journal article supplement (PMC8787808)
Supplement: NIHMS1761082-supplement-Supplemental_Material.pdf [file NIHMS1761082-supplement-Supplemental_Material.pdf]

Supplemental Table 1: International Classification of Disease, Ninth Revision, Clinical Modification codes (ICD-9-CM) used to identify patient records.

|                                                                   | ICD-9-CM codes                           |
|-------------------------------------------------------------------|------------------------------------------|
| Secondary and unspecified malignant neoplasm of lymph nodes       | 196                                      |
| Secondary malignant neoplasm of respiratory and digestive systems | 197                                      |
| Secondary malignant neoplasm of other specified sites             | 198                                      |
| Palliative care encounter                                         | V66.7                                    |
| Do-not-resuscitate (DNR) status                                   | V4986                                    |
| Prior radiation                                                   | V15.3                                    |
| In-hospital radiation                                             | 92.21, 92.22, 92.25, 92.27, 92.28, 92.29 |
| Chemotherapy                                                      | 99.25, 99.28, 00.10                      |
| Mechanical ventilation                                            | 96.70, 96.71, 96.72                      |
| Parenteral nutrition                                              | 96.6, 99.15                              |
| Hemodialysis                                                      | 39.95                                    |
